# Supplementary material for: Bridging the Gap between Field Experiments and Machine Learning: The EC H2020 B-GOOD Project as a Case Study towards Automated Predictive Health Monitoring of Honey Bee Colonies
Source: Insects. 2024 Jan 22;15(1):76. doi: 10.3390/insects15010076 (PMC10816039; doi:10.3390/insects15010076)
Supplement: Supplementary file 1 [file insects-15-00076-s001.zip]

Archive with 4 entries (4 files):
- S1_tier 1_workplans and protocols.pdf
- S1_tier 2_workplans and protocols.pdf
- S1_tier 3_workplans and protocols.pdf
- S2_ Table checklists (read only)_20220613.xlsx
