# Supplementary material for: Bridging the Gap between Field Experiments and Machine Learning: The EC H2020 B-GOOD Project as a Case Study towards Automated Predictive Health Monitoring of Honey Bee Colonies
Source: Insects. 2024 Jan 22;15(1):76. doi: 10.3390/insects15010076 (PMC10816039; doi:10.3390/insects15010076)
Supplement: Supplementary file 1 [file insects-15-00076-s001.zip › S2_ Table checklists (read only)_20220613.xlsx]

## Sheet: Inspections sheets
Supplementary information S2. Overview of B-GOOD summer and winter inspection checklists in the BEEP app. For inspection checklists, the BEEP app (https://beep.nl) allows a selection to be made from the complete list of checklist categories (see Figure 5 in the main manuscript). In B-GOOD, custom inspection checklists were created to enable research specific data collection by participants on col…
	Summer			Winter
Input type	Tier 1	Tier 2	Tier 3	Tier 1	Tier 2	Tier 3
Title checklist BEEP	Health	Bee Season(+)	Sampling/Health	Health	Overwintering	Health
Category	Bee colony	Bee colony	Bee colony	Bee colony	Bee colony	Bee colony
Label	Brood	Brood	Brood	Brood	Brood	Brood
Label	· Status	· Status	· Status	· Status	· Status	· Status
Boolean	- All stages	- All stages	- All stages	- All stages	- All stages	- All stages
Label	Population	Population	Population	Population	Population	Population
Boolean	· Sufficient adult bees	· Sufficient adult bees	· Sufficient adult bees	· Sufficient adult bees	· Sufficient adult bees	· Sufficient adult bees
Label	Queen	Queen	Queen	Queen	Queen	Queen
Boolean	· Presence	· Presence	· Presence	· Presence	· Presence	· Presence
Label	Space	Space	Space	Space	Space	Space
Boolean	· Suitable space	· Suitable space	· Suitable space	· Suitable space	· Suitable space	· Suitable space
Category	Disorder	Disorder	Disorder	Disorder	Disorder	Disorder
Boolean	Absence of stressors	Absence of stressors	Absence of stressors	Absence of stressors	Absence of stressors	Absence of stressors
Category	Food	Food	Food	Food	Food	Food
Boolean	Sufficient nutrition	Sufficient nutrition	Sufficient nutrition	Sufficient nutrition	Sufficient nutrition	Sufficient nutrition
Title checklist BEEP	Summer(+)			Winter
Category	Overall	Overall	Overall	Overall	Overall	Overall
Smiley score (🙂,😐 ,☹️)	Overall impression	Overall impression	Overall impression	Overall impression	Overall impression	Overall impression
Category	Bee colony	Bee colony	Bee colony	Bee colony	Bee colony	Bee colony
Label	Loss	Loss	Loss	Loss	Loss	Loss
Boolean	· Colony Loss	· Colony Loss	· Colony Loss	· Colony Loss	· Colony Loss	· Colony Loss
Text	- Note	- Note	- Note	- Note	- Note	- Note
Boolean	· Dead bees	· Dead bees	· Dead bees	· Dead bees	· Dead bees	· Dead bees
List	- Type	- Type	- Type	- Type	- Type	- Type
List item	- Queen	- Queen	- Queen	- Queen	- Queen	- Queen
Label	Size	Size		Size	Size
Label	· Top photo Analysis	· Top photo Analysis		· Top photo Analysis	· Top photo Analysis
Image	- Photo from top brood box	- Photo from top brood box		- Photo from top brood box	- Photo from top brood box
Number positive | min:0	- Pixels total hive top	- Pixels total hive top		- Pixels total hive top	- Pixels total hive top
Number positive | min:0	- Pixels with bees	- Pixels with bees		- Pixels with bees	- Pixels with bees
Number positive | min:0	- Colony size	- Colony size		- Colony size	- Colony size
Label	· Liebefeld method (Brood layer frames)
Number of squares of 25 cm2 | min:0 | decimals:1	- Bees
Number of squares of 25 cm2 | min:0 | decimals:1	- Pollen
Number of squares of 25 cm2 | min:0 | decimals:1	- Sealed honey
Number of squares of 25 cm2 | min:0 | decimals:1	- Larvae (open brood)
Number of squares of 25 cm2 | min:0 | decimals:1	- Pupae (capped brood)
Number of squares of 25 cm2 | min:0 | decimals:1	- Drone brood
Number of squares of 25 cm2 | min:0 | decimals:1	- Eggs
Label	· Liebefeld method (Honey layer)
Number of squares of 25 cm2 | min:0 | decimals:1	- Bees
Number of squares of 25 cm2 | min:0 | decimals:1	- Sealed honey
Label	Brood	Brood	Brood			Brood
Label	· Status	· Status	· Status			· Status
Boolean	- Eggs	- Eggs	- Eggs			- Eggs
Boolean	- Larvae	- Larvae	- Larvae			- Larvae
Boolean	- Pupae	- Pupae	- Pupae			- Pupae
Score (0-5) | min:1 | max:5 | decimals:0	· Pattern consistency
Label	Queen	Queen
Label	· Cells	· Cells
Boolean	- Emergency cell	- Emergency cell
Boolean	- Queen cup	- Queen cup
Boolean	- Supersedure cell	- Supersedure cell
Boolean	- Swarm cell	- Swarm cell
Label	Drones	Drones
Boolean	· Drone brood presence	· Drone brood presence
Category	Disorder	Disorder	Disorder
Label	Laboratory test*	Laboratory test*	Laboratory test*
Unique sample code	· Sample code	· Sample code	· Sample code
Label	Type	Type
Dropdown list	· Microbial diseases	· Microbial diseases
List item	- Protozoan (Amoeba disease)	- Protozoan (Amoeba disease)
Dropdown list	· Fungal	· Fungal
List item	- Stonebrood	- Stonebrood
List item	- Chalkbrood	- Chalkbrood
List item	- Nosema	- Nosema
Dropdown list	· Viral	· Viral
List item	- Lake Sinai Virus	- Lake Sinai Virus
List item	- Secoviridae(Tobacco ringspot virus)	- Secoviridae(Tobacco ringspot virus)
List item	- Iridoviridae (Invertebrate iridescent virus type 6)	- Iridoviridae (Invertebrate iridescent virus type 6)
List item	- Cloudy wing virus	- Cloudy wing virus
List item	- Sacbrood virus	- Sacbrood virus
List item	- Kakugo virus	- Kakugo virus
List item	- Deformed Wing Virus	- Deformed Wing Virus
List item	- Kashmir bee virus	- Kashmir bee virus
List item	- Israeli acute paralysis virus	- Israeli acute paralysis virus
List item	- Black queen cell virus	- Black queen cell virus
List item	- Acute bee paralysis virus	- Acute bee paralysis virus
List item	- Chronic bee paralysis virus	- Chronic bee paralysis virus
Dropdown list	· Bacterial	· Bacterial
List item	- European Foulbrood	- European Foulbrood
List item	- American Foulbrood	- American Foulbrood
Dropdown list	· Parasitic bee mites	· Parasitic bee mites
List item	- Tropilaelaps mites	- Tropilaelaps mites
List item	- Tracheal mites	- Tracheal mites
List item	- Varroa mites	- Varroa mites
Dropdown list	· Insects	· Insects
List item	- Greater wax moth	- Greater wax moth
List item	- Lesser wax moth	- Lesser wax moth
List item	- Ants	- Ants
List item	- Wasps	- Wasps
List item	- Hornets	- Hornets
List item	- Asian Hornets	- Asian Hornets
List item	- Small hive beetles	- Small hive beetles
Dropdown list	· Vertebrates	· Vertebrates
List item	- Amphibians	- Amphibians
List item	- Reptiles	- Reptiles
List item	- Birds	- Birds
List item	- Mice	- Mice
List item	- Badgers	- Badgers
List item	- Bears	- Bears
Label	Atypical behaviour
Boolean	· Atypical behaviour
Text	- Note
Title checklist BEEP	Varroa			Varroa
	Disorder			Disorder
	Varroa			Varroa
Boolean	· Count			· Count
Number per day |decimals:1	- Natural fall			- Natural fall
Text	- Note			- Note
* In summer, sample codes were only generated three times a year following sampling of bees (see P5 in Table 2 in the main manuscript). Hence, we made use of two inspection checklists for both Tier 1 (Summer and Summer+) and Tier 2 (Bee season and Bee season+), where the ‘+version’ included an extra sample code generator compared to the non ’+version’. In this table we show the ‘+versions’ to avo…
